# Supplementary material
Source: publisher site journal article supplement (https://www.spandidos-publications.com/5089/downloadSupplementary)

Figure S1. Target areas for chromatin immunoprecipitation-reverse transcription-quantitative PCR primers and a schematic of their locations on the neuropilin-1 gene. HNF4G, hepatocyte nuclear factor 4 $\gamma$ .

HNF4G binding site: chr10:33484619-33485108

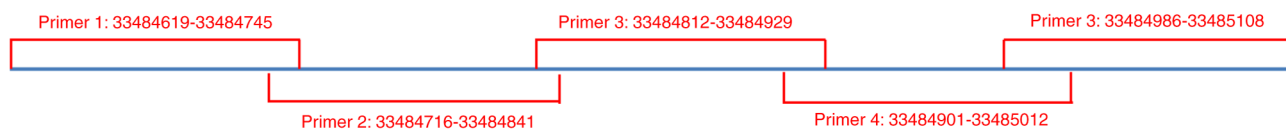

Figure S2. Representative flow cytometry plots. Cell cycle analysis after transfection with (A) HNF4G overexpression vector and (B) HNF4G siRNA-1 and siRNA-2. Cell apoptosis after transfection with (C) HNF4G overexpression vector and (D) HNF4G siRNA-1 and siRNA-2. HNF4G, hepatocyte nuclear factor 4 $\gamma$ ; ov, overexpression; siRNA, small interfering RNA; NC, negative control; UL, upper left; UR, upper right; LL, lower left; LR, lower right.

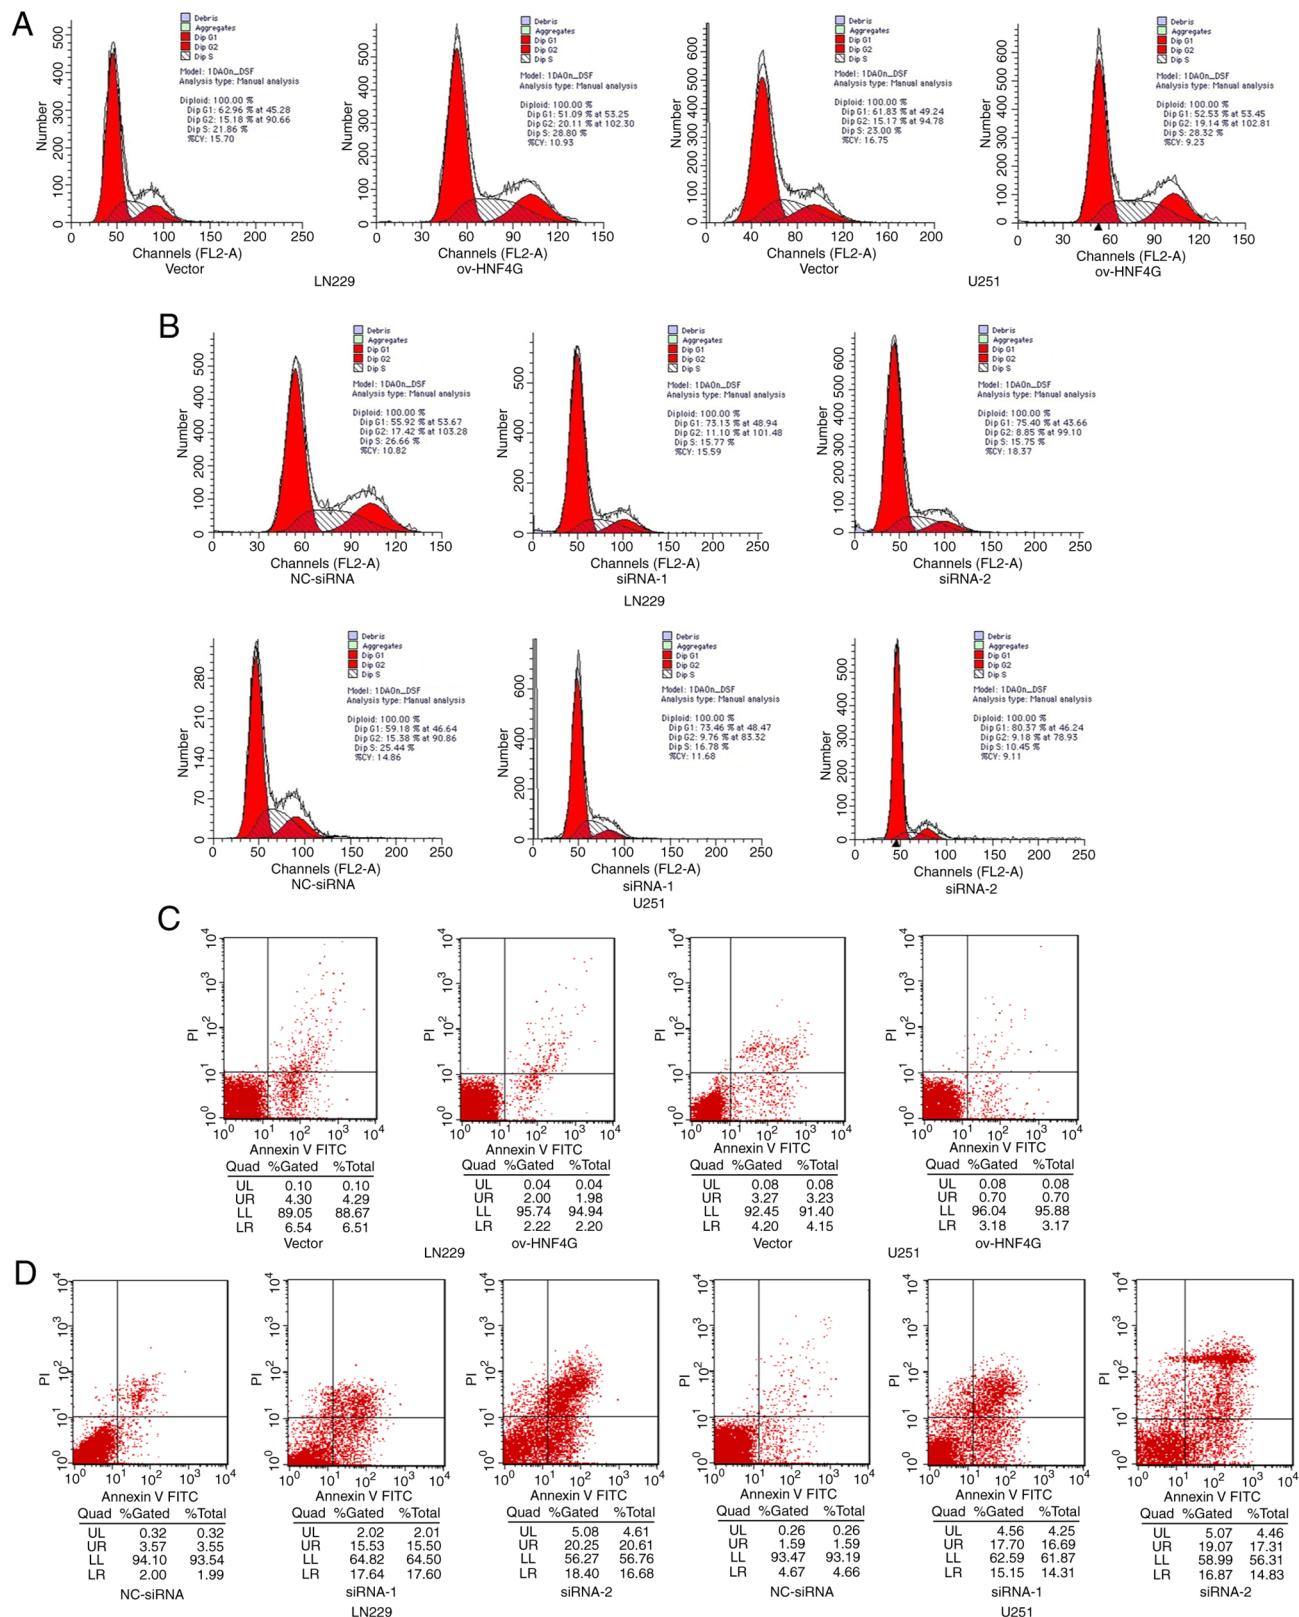

Figure S3. Representative flow cytometry charts. Cell cycle analysis after transfection with (A) NRP1 overexpression vector and (B) NRP1 siRNA-1 and siRNA-2. Cell apoptosis after transfection with (C) NRP1 overexpression vector and (D) NRP1 siRNA-1 and siRNA-2. NRP1, neuropilin-1; ov, overexpression; siRNA, small interfering RNA; NC, negative control; NC, negative control; UL, upper left; UR, upper right; LL, lower left; LR, lower right.

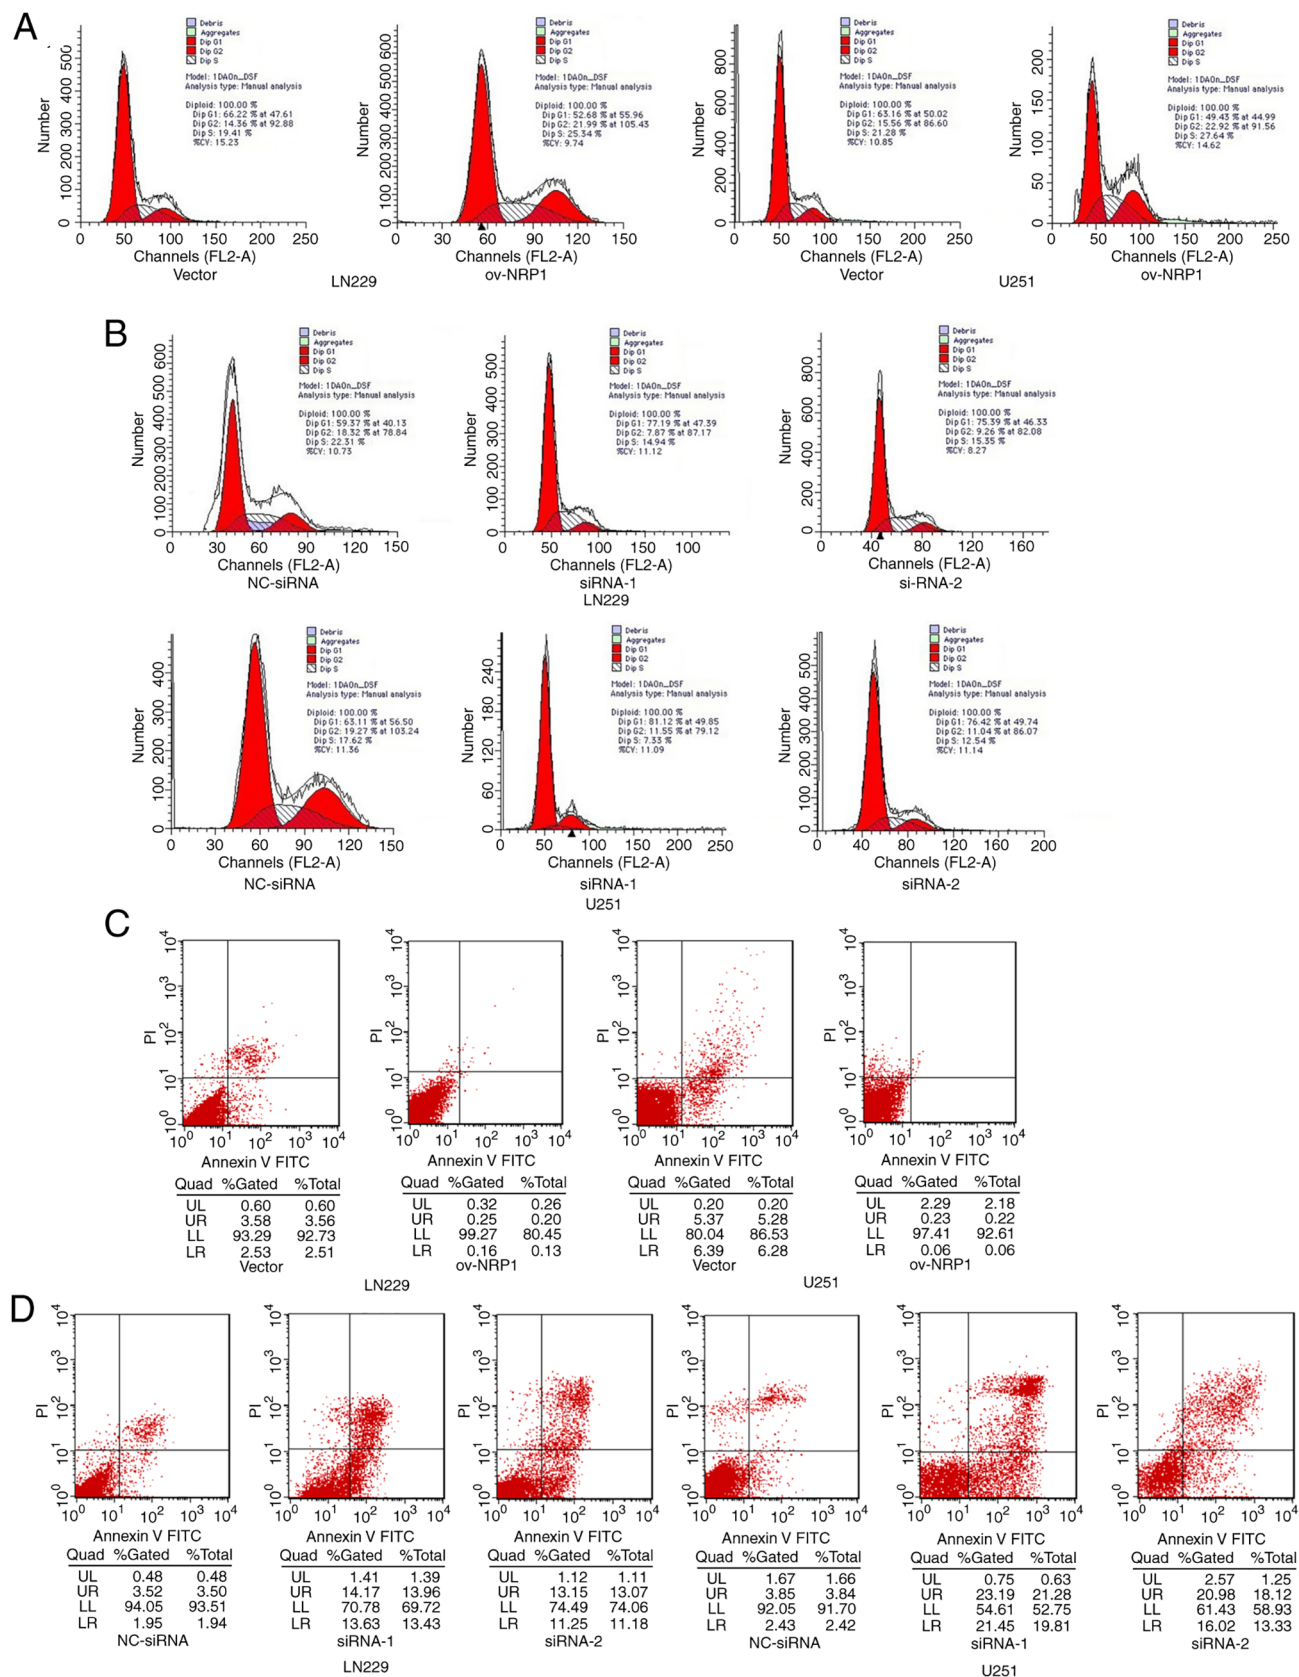

Figure S4. Representative flow cytometry charts. (A) Cell cycle analysis following co-transfection with HNF4G siRNA-2 and NRP1 overexpression vector. (B) Cell apoptosis following co-transfection with HNF4G siRNA-2 and NRP1 overexpression vector. HNF4G, hepatocyte nuclear factor 4γ; NRP1, neuropilin-1; ov, overexpression; siRNA, small interfering RNA; NC, negative control; NC, negative control; UL, upper left; UR, upper right; LL, lower left; LR, lower right.

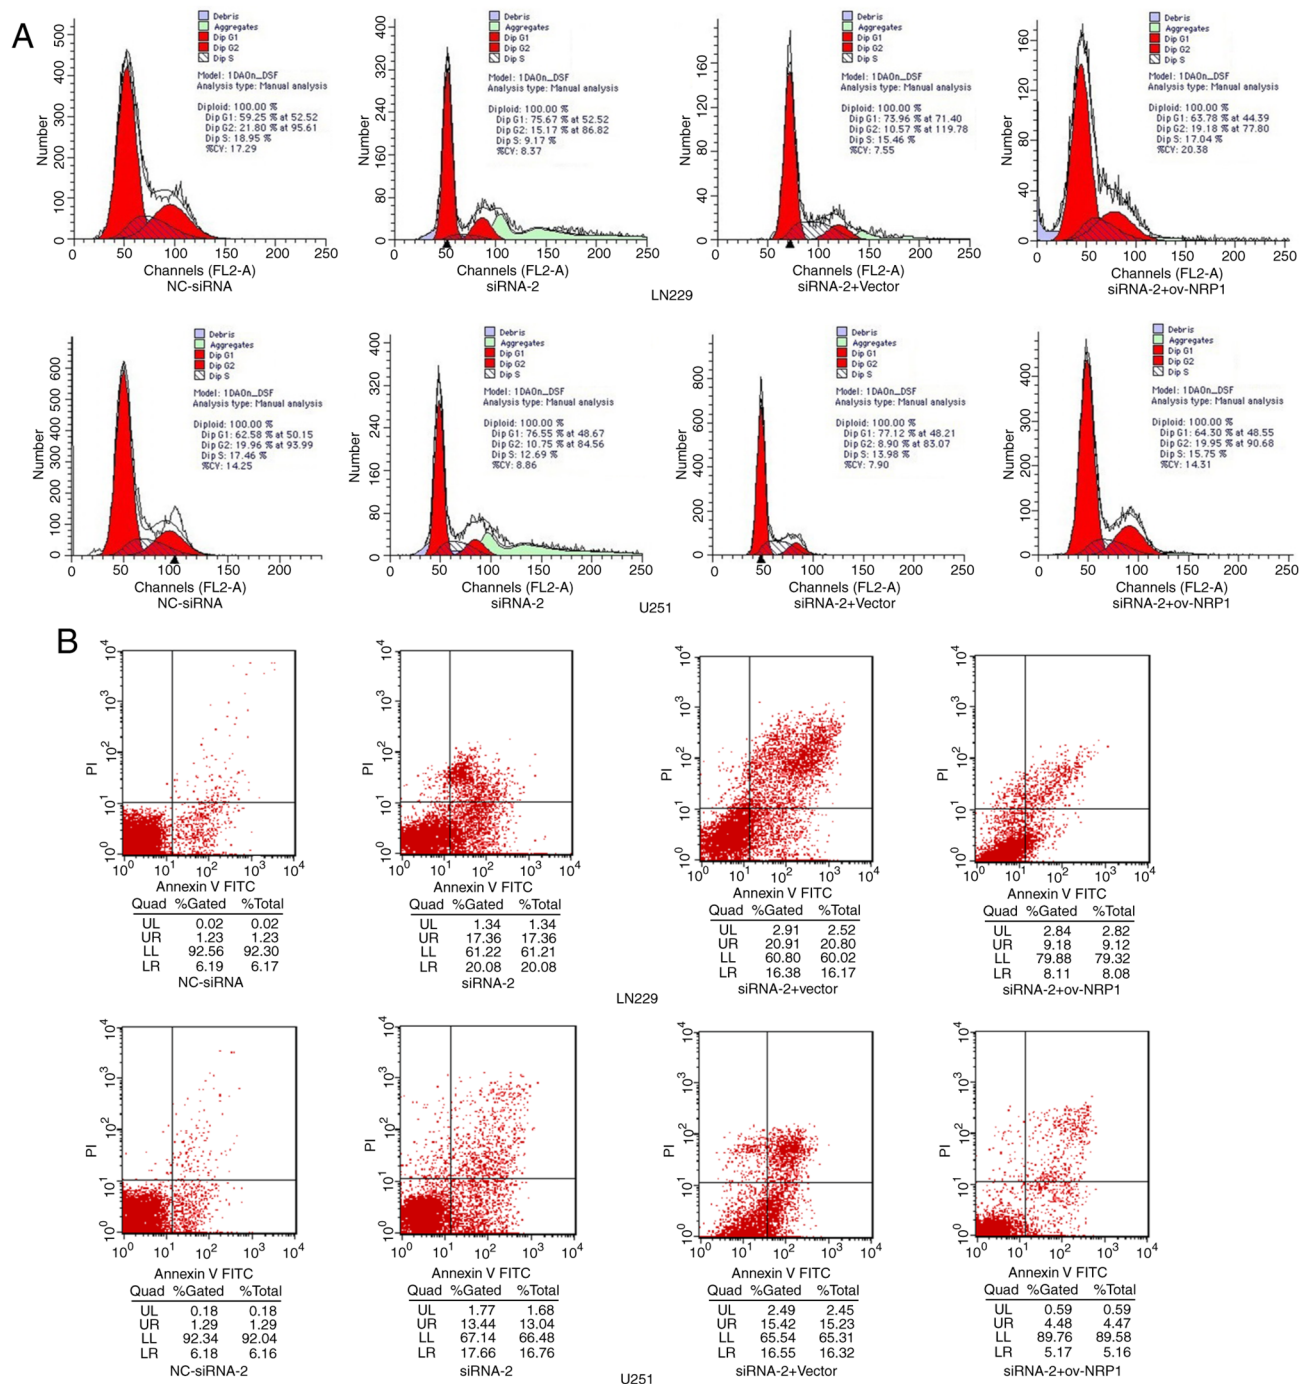

Supplement: Supplementary file 1 [file downloadSupplementary]
